# Supplementary material
Source: PubMed Central journal article supplement (PMC7084154)
Supplement: pnas.1922272117.sapp.pdf [file pnas.1922272117.sapp.pdf]

# PNAS

[www.pnas.org](http://www.pnas.org)

Supplementary Information for

**Clonemate cotransmission supports a role for kin selection in a puppeteer parasite**

Charles D. Criscione, Bradley J. van Paridon, John S. Gilleard, Cameron P. Goater

Charles D. Criscione  
Email: [ccriscione@bio.tamu.edu](mailto:ccriscione@bio.tamu.edu)

**This PDF file includes:**

Tables S1 to S3

**Table S1.** Raw genotype scores at 5 microsatellite loci for all 272 metacercariae genotyped from the ants (i.e., the N = 272 dataset).

Dicro\_ants  
 npops = 2  
 nloci = 5

|           | DdMs21  | DdMs28  | DdMs60  | DdMs70  | DdMs95  |
|-----------|---------|---------|---------|---------|---------|
| pop = SC  |         |         |         |         |         |
| SChC01i01 | 312 315 | 344 352 | 265 271 | 184 184 | 287 293 |
| SChC01i02 | 315 315 | 344 352 | 265 271 | 184 184 | 287 293 |
| SChC01i03 | 312 315 | 344 352 | 265 271 | 184 184 | 287 293 |
| SChC01i05 | 312 315 | 344 352 | 265 271 | 184 184 | 287 293 |
| SChC01i06 | 312 315 | 344 352 | 265 271 | 184 184 | 287 293 |
| SChC01i07 | 312 315 | 344 352 | 265 271 | 184 184 | 287 293 |
| SChC01i08 | 312 315 | 344 352 | 265 271 | 184 184 | 287 293 |
| SChC01i10 | 312 315 | 344 352 | 265 271 | 184 184 | 287 293 |
| SChC01i12 | 312 315 | 344 352 | 265 271 | 184 184 | 287 293 |
| SChC01i13 | 312 315 | 344 352 | 265 271 | 184 184 | 287 293 |
| SChC01i14 | 312 315 | 344 352 | 265 271 | 184 184 | 287 293 |
| SChC02i01 | 311 312 | 344 352 | 256 280 | 161 184 | 287 293 |
| SChC02i02 | 311 312 | 344 352 | 256 280 | 161 184 | 287 293 |
| SChC02i03 | 311 312 | 344 352 | 256 280 | 161 184 | 287 293 |
| SChC02i04 | 311 312 | 344 352 | 256 280 | 161 184 | 287 293 |
| SChC02i05 | 311 312 | 344 352 | 256 280 | 161 184 | 287 293 |
| SChC02i06 | 311 312 | 344 352 | 256 280 | 161 184 | 287 293 |
| SChC02i07 | 311 312 | 344 352 | 256 280 | 161 184 | 287 293 |
| SChC02i08 | 311 312 | 344 352 | 256 280 | 161 184 | 287 293 |
| SChC02i09 | 311 312 | 344 352 | 256 280 | 161 184 | 287 293 |
| SChC02i10 | 311 312 | 344 352 | 256 280 | 161 184 | 287 293 |
| SChC02i11 | 311 312 | 344 352 | 256 280 | 161 184 | 287 287 |
| SChC02i12 | 311 312 | 344 352 | 256 280 | 161 184 | 287 293 |
| SChC02i13 | 311 312 | 344 352 | 256 280 | 161 184 | 287 293 |
| SChC02i14 | 311 312 | 344 352 | 256 280 | 161 184 | 287 293 |
| SChC02i15 | 311 312 | 344 352 | 256 280 | 161 184 | 287 293 |
| SChC02i16 | 311 312 | 344 352 | 256 280 | 161 184 | 287 293 |
| SChC02i18 | 311 312 | 344 352 | 256 280 | 161 184 | 287 293 |
| SChC02i19 | 311 312 | 344 352 | 256 280 | 161 184 | 287 293 |
| SChC02i20 | 311 312 | 344 352 | 256 280 | 161 184 | 287 293 |
| SChC02i21 | 311 312 | 344 352 | 256 280 | 161 184 | 287 293 |
| SChC02iH  | 311 312 | 344 352 | 256 280 | 161 184 | 287 293 |
| SChC03i01 | 312 312 | 352 362 | 256 259 | 159 161 | 287 293 |
| SChC03i02 | 312 312 | 352 362 | 256 259 | 159 161 | 287 293 |
| SChC03i04 | 311 311 | 344 352 | 259 286 | 164 173 | 287 293 |
| SChC03i05 | 312 312 | 352 362 | 256 259 | 159 161 | 287 293 |
| SChC03i06 | 312 312 | 352 362 | 256 259 | 159 161 | 287 293 |
| SChC03i07 | 312 312 | 352 362 | 256 259 | 159 161 | 287 293 |
| SChC03i08 | 312 312 | 352 362 | 256 259 | 159 161 | 287 293 |

|           |         |         |         |         |         |
|-----------|---------|---------|---------|---------|---------|
| SChC03i13 | 312 312 | 352 362 | 256 259 | 159 161 | 287 293 |
| SChC03i14 | 312 312 | 352 362 | 256 259 | 159 161 | 287 293 |
| SChC03i15 | 311 312 | 344 352 | 259 286 | 164 173 | 287 293 |
| SChC03i16 | 312 312 | 352 362 | 256 259 | 159 161 | 287 293 |
| SChC03i18 | 311 312 | 344 352 | 259 286 | 164 173 | 287 293 |
| SChC03i19 | 312 312 | 352 362 | 256 259 | 159 161 | 287 293 |
| SChC03i20 | 311 312 | 344 352 | 259 286 | 164 173 | 287 293 |
| SChC03iH  | 312 312 | 362 362 | 256 259 | 161 161 | 293 293 |
| SChC04i01 | 315 318 | 344 355 | 256 256 | 164 164 | 287 289 |
| SChC04i02 | 311 318 | 348 355 | 256 271 | 161 196 | 287 287 |
| SChC04i03 | 312 364 | 344 348 | 268 280 | 164 196 | 287 293 |
| SChC04i04 | 315 315 | 344 352 | 280 280 | 153 153 | 287 287 |
| SChC04i05 | 311 318 | 348 355 | 256 271 | 161 196 | 287 287 |
| SChC04i06 | 315 318 | 344 355 | 256 256 | 164 164 | 287 289 |
| SChC04i07 | 315 315 | 347 348 | 256 259 | 161 196 | 287 287 |
| SChC04i08 | 311 318 | 348 355 | 256 271 | 161 196 | 287 287 |
| SChC04i09 | 315 318 | 344 355 | 256 256 | 164 164 | 287 289 |
| SChC04i10 | 315 315 | 347 348 | 256 259 | 161 196 | 287 287 |
| SChC04i11 | 311 315 | 348 348 | 256 268 | 164 164 | 287 299 |
| SChC04i12 | 311 318 | 348 355 | 256 271 | 161 196 | 287 287 |
| SChC04i13 | 312 364 | 344 348 | 268 280 | 164 196 | 287 293 |
| SChC04i14 | 311 318 | 348 355 | 256 271 | 161 196 | 287 287 |
| SChC04i15 | 311 315 | 344 352 | 256 282 | 154 165 | 287 301 |
| SChC04i16 | 315 315 | 347 348 | 256 259 | 161 196 | 287 287 |
| SChC04i17 | 311 318 | 348 355 | 256 271 | 161 196 | 287 287 |
| SChC04i18 | 315 318 | 344 355 | 256 256 | 164 164 | 287 289 |
| SChC04i19 | 315 318 | 344 355 | 256 256 | 164 164 | 287 289 |
| SChC04i20 | 315 318 | 344 355 | 256 256 | 164 164 | 287 289 |
| SChC04i21 | 315 318 | 344 355 | 256 256 | 164 164 | 287 289 |
| SChC04iH  | 312 364 | 344 348 | 268 280 | 164 196 | 287 293 |
| SChC05i01 | 315 315 | 348 360 | 262 262 | 164 196 | 287 291 |
| SChC05i02 | 315 315 | 348 360 | 262 262 | 164 196 | 287 291 |
| SChC05i03 | 315 315 | 348 360 | 262 262 | 164 196 | 287 291 |
| SChC05i04 | 311 344 | 348 355 | 256 259 | 164 165 | 287 289 |
| SChC05i05 | 318 318 | 352 352 | 256 262 | 161 165 | 287 287 |
| SChC05i06 | 318 318 | 352 352 | 256 262 | 161 165 | 287 287 |
| SChC05i07 | 311 344 | 348 355 | 256 259 | 164 165 | 287 289 |
| SChC05i09 | 311 344 | 348 355 | 256 259 | 164 165 | 287 289 |
| SChC05i11 | 311 344 | 348 355 | 256 259 | 164 165 | 287 289 |
| SChC05i12 | 311 344 | 348 355 | 256 259 | 164 165 | 287 289 |
| SChC05i14 | 311 344 | 348 355 | 256 259 | 164 165 | 287 289 |
| SChC05i15 | 311 318 | 344 352 | 259 259 | 164 165 | 287 287 |
| SChC05i16 | 311 344 | 348 355 | 256 259 | 164 165 | 287 289 |
| SChC05i17 | 315 315 | 348 360 | 262 262 | 164 196 | 287 291 |
| SChC05i18 | 311 344 | 348 355 | 256 259 | 164 165 | 287 289 |
| SChC05i20 | 318 318 | 352 352 | 256 262 | 161 165 | 287 287 |
| SChC06i02 | 312 318 | 352 352 | 256 259 | 173 183 | 287 291 |

|           |         |         |         |         |         |
|-----------|---------|---------|---------|---------|---------|
| SChC06i03 | 312 312 | 348 348 | 259 259 | 183 196 | 287 287 |
| SChC06i05 | 312 318 | 352 352 | 256 259 | 173 183 | 287 291 |
| SChC06i06 | 312 318 | 352 352 | 256 259 | 173 183 | 287 291 |
| SChC06i07 | 312 318 | 352 352 | 256 259 | 173 183 | 287 291 |
| SChC06i08 | 315 315 | 348 352 | 256 259 | 164 164 | 287 289 |
| SChC06i09 | 312 312 | 348 348 | 259 259 | 183 196 | 287 287 |
| SChC06i11 | 312 318 | 352 352 | 256 259 | 173 183 | 287 291 |
| SChC06i12 | 318 318 | 347 352 | 271 282 | 153 159 | 287 301 |
| SChC06i14 | 315 315 | 348 352 | 256 259 | 164 164 | 287 289 |
| SChC06i15 | 315 315 | 348 352 | 256 259 | 164 164 | 287 289 |
| SChC06i16 | 318 318 | 347 352 | 271 282 | 153 159 | 287 301 |
| SChC06i17 | 318 318 | 347 352 | 271 282 | 153 159 | 287 301 |
| SChC06i18 | 318 318 | 348 355 | 256 262 | 161 184 | 287 287 |
| SChC06i19 | 312 318 | 352 352 | 256 259 | 173 183 | 287 291 |
| SChC06i20 | 312 312 | 348 348 | 259 259 | 183 196 | 287 287 |
| SChC06i21 | 312 312 | 348 348 | 259 259 | 183 196 | 287 287 |
| SChC06iH  | 312 318 | 347 352 | 271 282 | 153 173 | 287 291 |
| SChC08i01 | 312 312 | 352 362 | 256 259 | 159 161 | 287 293 |
| SChC08i03 | 311 312 | 344 352 | 259 286 | 164 173 | 287 293 |
| SChC08i04 | 311 312 | 344 352 | 259 286 | 164 173 | 287 293 |
| SChC08i05 | 312 312 | 352 362 | 256 259 | 159 161 | 287 293 |
| SChC08i06 | 312 312 | 352 362 | 256 259 | 159 161 | 287 293 |
| SChC08i07 | 312 312 | 352 362 | 256 259 | 159 161 | 287 293 |
| SChC08i08 | 311 312 | 344 352 | 259 286 | 164 173 | 287 293 |
| SChC08i09 | 312 312 | 352 362 | 256 259 | 159 161 | 287 293 |
| SChC08i10 | 312 312 | 352 362 | 256 259 | 159 161 | 287 293 |
| SChC08i12 | 312 312 | 352 362 | 256 259 | 159 161 | 287 293 |
| SChC08i13 | 311 312 | 344 352 | 259 286 | 164 173 | 287 293 |
| SChC08i14 | 311 312 | 344 352 | 259 286 | 164 173 | 287 293 |
| SChC08i15 | 312 312 | 352 362 | 256 259 | 159 161 | 287 293 |
| SChC08i16 | 312 312 | 352 362 | 256 259 | 159 161 | 287 293 |
| SChC08i17 | 311 311 | 344 352 | 259 286 | 164 173 | 287 293 |
| SChC08i18 | 311 311 | 344 352 | 259 286 | 164 173 | 287 293 |
| SChC08i19 | 312 312 | 352 362 | 256 259 | 159 161 | 287 293 |
| SChC08i20 | 312 312 | 352 362 | 256 259 | 159 161 | 287 293 |
| SChC08i21 | 312 312 | 352 362 | 256 259 | 159 161 | 287 293 |
| SChC08iH  | 311 312 | 344 352 | 259 286 | 164 173 | 287 293 |
| SChC09i10 | 312 326 | 344 352 | 256 259 | 177 183 | 287 293 |
| SChC09i18 | 311 311 | 344 352 | 259 271 | 161 196 | 287 287 |
| SChC09iH  | 312 315 | 348 362 | 256 256 | 161 165 | 287 287 |
| SChC10i01 | 311 318 | 344 352 | 259 259 | 164 165 | 287 287 |
| SChC10i02 | 311 318 | 344 352 | 259 259 | 164 165 | 287 287 |
| SChC10i03 | 311 318 | 344 352 | 259 259 | 164 165 | 287 287 |
| SChC10i05 | 311 344 | 348 355 | 256 259 | 164 165 | 287 289 |
| SChC10i07 | 311 344 | 348 355 | 256 259 | 164 165 | 287 289 |
| SChC10i11 | 311 318 | 344 352 | 259 259 | 164 165 | 287 287 |
| SChC10i15 | 311 344 | 348 355 | 256 259 | 164 165 | 287 289 |

|           |         |         |         |         |         |
|-----------|---------|---------|---------|---------|---------|
| SChC10iH  | 318 318 | 352 352 | 256 262 | 161 165 | 287 287 |
| pop = TC  |         |         |         |         |         |
| TChB01i05 | 312 315 | 344 348 | 256 256 | 164 173 | 287 301 |
| TChB01i06 | 312 315 | 344 348 | 256 256 | 164 173 | 287 301 |
| TChB01i07 | 312 315 | 344 348 | 256 256 | 164 173 | 287 301 |
| TChB01i08 | 312 315 | 344 348 | 256 256 | 164 173 | 287 301 |
| TChB01i09 | 312 315 | 344 348 | 256 256 | 164 173 | 287 301 |
| TChB01i10 | 312 315 | 344 348 | 256 256 | 164 173 | 287 301 |
| TChB01i11 | 312 315 | 344 348 | 256 256 | 164 173 | 287 301 |
| TChB01i12 | 312 315 | 344 348 | 256 256 | 164 173 | 287 301 |
| TChB01i13 | 312 315 | 344 348 | 256 256 | 164 173 | 287 301 |
| TChB01i14 | 312 315 | 344 348 | 256 256 | 164 173 | 287 301 |
| TChB01i15 | 312 315 | 344 348 | 256 256 | 164 173 | 287 301 |
| TChB01i16 | 312 315 | 344 348 | 256 256 | 164 173 | 287 301 |
| TChB02i22 | 312 315 | 348 355 | 259 271 | 164 165 | 287 289 |
| TChB02i23 | 312 315 | 343 355 | 256 256 | 161 164 | 287 293 |
| TChB02i24 | 312 315 | 348 355 | 259 271 | 164 165 | 287 289 |
| TChB02i26 | 312 315 | 348 355 | 259 271 | 164 165 | 287 289 |
| TChB02i27 | 312 315 | 348 355 | 259 271 | 164 165 | 287 289 |
| TChB02i28 | 312 315 | 348 355 | 259 271 | 164 165 | 287 289 |
| TChB02i29 | 312 315 | 348 355 | 259 271 | 164 165 | 287 289 |
| TChB02i30 | 312 315 | 348 355 | 259 271 | 164 165 | 287 289 |
| TChB02i31 | 312 315 | 348 355 | 259 271 | 164 165 | 287 289 |
| TChB02i32 | 312 315 | 355 355 | 256 256 | 161 164 | 287 293 |
| TChB02i33 | 312 315 | 348 355 | 259 271 | 164 165 | 287 289 |
| TChB02i34 | 312 315 | 348 355 | 259 271 | 164 165 | 287 289 |
| TChB02i35 | 312 315 | 348 355 | 259 271 | 164 165 | 287 289 |
| TChB02i36 | 312 315 | 343 355 | 256 256 | 161 164 | 287 293 |
| TChB02i37 | 312 315 | 348 355 | 259 271 | 164 165 | 287 289 |
| TChB02i38 | 312 315 | 348 355 | 259 271 | 164 165 | 287 289 |
| TChB02i39 | 312 315 | 348 355 | 259 271 | 164 165 | 287 289 |
| TChB02i40 | 312 315 | 343 355 | 256 256 | 161 164 | 287 293 |
| TChB02i41 | 312 315 | 343 355 | 256 256 | 161 164 | 287 293 |
| TChB02i42 | 312 315 | 348 355 | 259 271 | 164 165 | 287 289 |
| TChB02i43 | 312 315 | 348 355 | 259 271 | 164 165 | 287 289 |
| TChB02i45 | 312 315 | 348 355 | 259 271 | 164 165 | 287 289 |
| TChB02i46 | 312 315 | 348 355 | 259 271 | 164 165 | 287 289 |
| TChB02i47 | 312 315 | 348 355 | 259 271 | 164 165 | 287 289 |
| TChB02i48 | 312 315 | 343 355 | 256 256 | 161 164 | 287 293 |
| TChB02i49 | 312 315 | 348 355 | 259 271 | 164 165 | 287 289 |
| TChB02i50 | 312 315 | 348 355 | 259 271 | 164 165 | 287 289 |
| TChB02i51 | 312 315 | 348 355 | 259 271 | 164 165 | 287 289 |
| TChB03i01 | 332 332 | 348 355 | 259 259 | 161 171 | 287 289 |
| TChB03i02 | 332 332 | 348 355 | 259 259 | 161 171 | 287 289 |
| TChB03i04 | 332 332 | 348 355 | 259 259 | 161 171 | 287 289 |
| TChB03i05 | 332 332 | 348 355 | 259 259 | 161 171 | 287 289 |
| TChB03i06 | 332 332 | 348 355 | 259 259 | 161 171 | 287 289 |

|           |         |         |         |         |         |
|-----------|---------|---------|---------|---------|---------|
| TChB03i07 | 332 332 | 348 355 | 259 259 | 161 171 | 287 289 |
| TChB03i08 | 332 332 | 348 355 | 259 259 | 161 171 | 287 289 |
| TChB03i09 | 332 332 | 348 355 | 259 259 | 161 171 | 287 289 |
| TChB03i10 | 332 332 | 348 355 | 259 259 | 161 171 | 287 289 |
| TChB03i11 | 332 332 | 348 355 | 259 259 | 161 171 | 287 289 |
| TChB03i13 | 332 332 | 348 355 | 259 259 | 161 171 | 287 289 |
| TChB03i14 | 332 332 | 348 355 | 259 259 | 161 171 | 287 289 |
| TChB03i15 | 332 332 | 348 355 | 259 259 | 161 171 | 287 289 |
| TChB03i16 | 332 332 | 348 355 | 259 259 | 161 171 | 287 289 |
| TChB03i17 | 332 332 | 348 355 | 259 259 | 161 171 | 287 289 |
| TChB03i18 | 332 332 | 348 355 | 259 259 | 161 171 | 287 289 |
| TChB03i19 | 332 332 | 348 355 | 259 259 | 161 171 | 287 289 |
| TChB03i20 | 332 332 | 348 355 | 259 259 | 161 171 | 287 289 |
| TChB03i21 | 332 332 | 348 355 | 259 259 | 161 171 | 287 289 |
| TChB03iH  | 332 332 | 348 355 | 259 259 | 161 171 | 287 289 |
| TChB04i02 | 312 315 | 344 344 | 256 280 | 153 173 | 291 301 |
| TChB04i03 | 312 315 | 344 344 | 256 280 | 153 173 | 291 301 |
| TChB04i10 | 311 318 | 348 355 | 256 259 | 164 173 | 287 287 |
| TChB04i17 | 312 315 | 344 344 | 256 280 | 153 173 | 291 301 |
| TChB05i01 | 311 332 | 344 348 | 262 282 | 159 161 | 287 287 |
| TChB05i03 | 311 332 | 344 348 | 262 282 | 159 161 | 287 287 |
| TChB05i04 | 311 332 | 344 348 | 262 282 | 159 161 | 287 287 |
| TChB05i05 | 311 332 | 344 348 | 262 282 | 159 161 | 287 287 |
| TChB05i06 | 311 332 | 344 348 | 262 282 | 159 161 | 287 287 |
| TChB05i07 | 311 332 | 344 348 | 262 282 | 159 161 | 287 287 |
| TChB05i08 | 311 332 | 344 348 | 262 282 | 159 161 | 287 287 |
| TChB05i09 | 311 332 | 344 348 | 262 282 | 159 161 | 287 287 |
| TChB05i10 | 311 332 | 344 348 | 262 282 | 159 161 | 287 287 |
| TChB05i11 | 311 332 | 344 348 | 262 282 | 159 161 | 287 287 |
| TChB05i12 | 311 332 | 344 348 | 262 282 | 159 161 | 287 287 |
| TChB05i13 | 311 332 | 344 348 | 262 282 | 159 161 | 287 287 |
| TChB05i14 | 311 332 | 344 348 | 262 282 | 159 161 | 287 287 |
| TChB05i15 | 311 332 | 344 348 | 262 282 | 159 161 | 287 287 |
| TChB05i16 | 311 332 | 344 348 | 262 282 | 159 161 | 287 287 |
| TChB05i17 | 311 332 | 344 348 | 262 282 | 159 161 | 287 287 |
| TChB05i18 | 311 332 | 344 348 | 262 282 | 159 161 | 287 287 |
| TChB05i20 | 311 332 | 344 348 | 262 282 | 159 161 | 287 287 |
| TChB05i21 | 311 332 | 344 348 | 262 282 | 159 161 | 287 287 |
| TChB06i05 | 312 312 | 344 356 | 251 256 | 164 171 | 287 287 |
| TChB06i07 | 312 318 | 344 355 | 256 256 | 196 196 | 297 301 |
| TChB06i08 | 312 312 | 344 356 | 251 256 | 164 171 | 287 287 |
| TChB06i12 | 312 312 | 344 356 | 251 256 | 164 171 | 287 287 |
| TChB06i15 | 312 312 | 344 356 | 251 256 | 164 171 | 287 287 |
| TChB06i16 | 312 312 | 344 356 | 251 256 | 164 171 | 287 287 |
| TChB06i19 | 312 315 | 352 352 | 256 271 | 177 183 | 285 289 |
| TChB06i20 | 312 312 | 344 356 | 251 256 | 164 171 | 287 287 |
| TChB06iH  | 311 315 | 352 355 | 256 259 | 196 196 | 287 287 |

|           |         |         |         |         |         |
|-----------|---------|---------|---------|---------|---------|
| TChB07i02 | 312 315 | 348 356 | 256 280 | 164 171 | 287 287 |
| TChB07i03 | 315 315 | 344 347 | 259 262 | 164 184 | 287 293 |
| TChB07i04 | 315 366 | 352 355 | 256 256 | 164 164 | 287 287 |
| TChB07i05 | 315 315 | 344 347 | 259 262 | 164 184 | 287 293 |
| TChB07i07 | 315 315 | 344 347 | 259 262 | 164 184 | 287 293 |
| TChB07i08 | 315 315 | 344 347 | 259 262 | 164 184 | 287 293 |
| TChB07i09 | 318 321 | 348 348 | 256 271 | 153 153 | 287 297 |
| TChB07i10 | 311 315 | 348 362 | 256 256 | 164 164 | 287 301 |
| TChB07i11 | 315 366 | 352 355 | 256 256 | 164 164 | 287 287 |
| TChB07i12 | 312 332 | 344 352 | 259 271 | 177 183 | 287 289 |
| TChB07i13 | 315 366 | 352 355 | 256 256 | 164 164 | 287 287 |
| TChB07i14 | 311 315 | 348 362 | 256 256 | 161 164 | 287 301 |
| TChB07i15 | 315 315 | 344 347 | 259 262 | 164 184 | 287 293 |
| TChB07i16 | 315 366 | 352 355 | 256 256 | 164 164 | 287 287 |
| TChB07i17 | 315 366 | 352 355 | 256 256 | 164 164 | 287 287 |
| TChB07i18 | 311 312 | 344 352 | 259 265 | 164 164 | 289 291 |
| TChB07i19 | 315 315 | 344 347 | 259 262 | 164 184 | 287 293 |
| TChB07i20 | 311 312 | 344 352 | 259 265 | 164 164 | 289 291 |
| TChB07i21 | 311 315 | 348 362 | 256 256 | 164 164 | 287 301 |
| TChB07iH  | 315 315 | 344 347 | 259 262 | 164 184 | 287 293 |
| TChB08i01 | 312 315 | 348 366 | 256 259 | 164 171 | 285 301 |
| TChB08i10 | 312 315 | 348 366 | 256 259 | 164 171 | 285 301 |
| TChB08i12 | 312 312 | 348 366 | 256 271 | 161 165 | 287 289 |
| TChB08i14 | 312 315 | 344 344 | 265 286 | 164 164 | 287 287 |
| TChB09i01 | 312 318 | 348 352 | 260 271 | 169 196 | 287 287 |
| TChB09i02 | 312 318 | 352 356 | 256 271 | 159 161 | 285 287 |
| TChB09i03 | 311 318 | 348 352 | 256 259 | 164 177 | 287 287 |
| TChB09i04 | 312 315 | 344 356 | 256 256 | 153 196 | 287 293 |
| TChB09i05 | 312 318 | 352 356 | 256 271 | 159 161 | 285 287 |
| TChB09i06 | 312 315 | 344 356 | 256 256 | 153 196 | 287 293 |
| TChB09i07 | 312 315 | 344 356 | 256 256 | 153 196 | 287 293 |
| TChB09i08 | 312 315 | 344 356 | 256 256 | 153 196 | 287 293 |
| TChB09i09 | 312 315 | 344 356 | 256 256 | 153 196 | 287 293 |
| TChB09i10 | 312 318 | 352 356 | 256 271 | 159 161 | 285 287 |
| TChB09i11 | 312 315 | 344 356 | 256 256 | 153 196 | 287 293 |
| TChB09i12 | 312 318 | 348 352 | 260 271 | 169 196 | 287 287 |
| TChB09i13 | 311 318 | 348 352 | 256 259 | 164 177 | 287 287 |
| TChB09i14 | 312 318 | 348 352 | 260 271 | 169 196 | 287 287 |
| TChB09i15 | 312 318 | 348 352 | 260 271 | 169 196 | 287 287 |
| TChB09i16 | 311 312 | 344 352 | 256 286 | 171 183 | 287 291 |
| TChB09i17 | 311 318 | 348 352 | 256 259 | 164 177 | 287 287 |
| TChB09i18 | 312 318 | 352 356 | 256 271 | 159 161 | 285 287 |
| TChB09i19 | 312 315 | 344 348 | 256 271 | 164 196 | 287 287 |
| TChB09i20 | 312 315 | 355 355 | 256 259 | 164 164 | 287 287 |
| TChB09i21 | 312 318 | 352 355 | 256 256 | 177 177 | 287 287 |
| TChB09iH  | 315 315 | 344 356 | 256 256 | 153 196 | 287 293 |

**Table S2.** Same data file as in Table S1, but where 6 genotypes were modified as outlined in the main text (i.e., the  $N = 272\text{mod}$  dataset).

Dicro\_ants  
 npops = 2  
 nloci = 5

|           | DdMs21  | DdMs28  | DdMs60  | DdMs70  | DdMs95  |
|-----------|---------|---------|---------|---------|---------|
| pop = SC  |         |         |         |         |         |
| SChC01i01 | 312 315 | 344 352 | 265 271 | 184 184 | 287 293 |
| SChC01i02 | 312 315 | 344 352 | 265 271 | 184 184 | 287 293 |
| SChC01i03 | 312 315 | 344 352 | 265 271 | 184 184 | 287 293 |
| SChC01i05 | 312 315 | 344 352 | 265 271 | 184 184 | 287 293 |
| SChC01i06 | 312 315 | 344 352 | 265 271 | 184 184 | 287 293 |
| SChC01i07 | 312 315 | 344 352 | 265 271 | 184 184 | 287 293 |
| SChC01i08 | 312 315 | 344 352 | 265 271 | 184 184 | 287 293 |
| SChC01i10 | 312 315 | 344 352 | 265 271 | 184 184 | 287 293 |
| SChC01i12 | 312 315 | 344 352 | 265 271 | 184 184 | 287 293 |
| SChC01i13 | 312 315 | 344 352 | 265 271 | 184 184 | 287 293 |
| SChC01i14 | 312 315 | 344 352 | 265 271 | 184 184 | 287 293 |
| SChC02i01 | 311 312 | 344 352 | 256 280 | 161 184 | 287 293 |
| SChC02i02 | 311 312 | 344 352 | 256 280 | 161 184 | 287 293 |
| SChC02i03 | 311 312 | 344 352 | 256 280 | 161 184 | 287 293 |
| SChC02i04 | 311 312 | 344 352 | 256 280 | 161 184 | 287 293 |
| SChC02i05 | 311 312 | 344 352 | 256 280 | 161 184 | 287 293 |
| SChC02i06 | 311 312 | 344 352 | 256 280 | 161 184 | 287 293 |
| SChC02i07 | 311 312 | 344 352 | 256 280 | 161 184 | 287 293 |
| SChC02i08 | 311 312 | 344 352 | 256 280 | 161 184 | 287 293 |
| SChC02i09 | 311 312 | 344 352 | 256 280 | 161 184 | 287 293 |
| SChC02i10 | 311 312 | 344 352 | 256 280 | 161 184 | 287 293 |
| SChC02i11 | 311 312 | 344 352 | 256 280 | 161 184 | 287 293 |
| SChC02i12 | 311 312 | 344 352 | 256 280 | 161 184 | 287 293 |
| SChC02i13 | 311 312 | 344 352 | 256 280 | 161 184 | 287 293 |
| SChC02i14 | 311 312 | 344 352 | 256 280 | 161 184 | 287 293 |
| SChC02i15 | 311 312 | 344 352 | 256 280 | 161 184 | 287 293 |
| SChC02i16 | 311 312 | 344 352 | 256 280 | 161 184 | 287 293 |
| SChC02i18 | 311 312 | 344 352 | 256 280 | 161 184 | 287 293 |
| SChC02i19 | 311 312 | 344 352 | 256 280 | 161 184 | 287 293 |
| SChC02i20 | 311 312 | 344 352 | 256 280 | 161 184 | 287 293 |
| SChC02i21 | 311 312 | 344 352 | 256 280 | 161 184 | 287 293 |
| SChC02iH  | 311 312 | 344 352 | 256 280 | 161 184 | 287 293 |
| SChC03i01 | 312 312 | 352 362 | 256 259 | 159 161 | 287 293 |
| SChC03i02 | 312 312 | 352 362 | 256 259 | 159 161 | 287 293 |
| SChC03i04 | 311 312 | 344 352 | 259 286 | 164 173 | 287 293 |
| SChC03i05 | 312 312 | 352 362 | 256 259 | 159 161 | 287 293 |
| SChC03i06 | 312 312 | 352 362 | 256 259 | 159 161 | 287 293 |
| SChC03i07 | 312 312 | 352 362 | 256 259 | 159 161 | 287 293 |
| SChC03i08 | 312 312 | 352 362 | 256 259 | 159 161 | 287 293 |



|           |         |         |         |         |         |
|-----------|---------|---------|---------|---------|---------|
| SChC03i13 | 312 312 | 352 362 | 256 259 | 159 161 | 287 293 |
| SChC03i14 | 312 312 | 352 362 | 256 259 | 159 161 | 287 293 |
| SChC03i15 | 311 312 | 344 352 | 259 286 | 164 173 | 287 293 |
| SChC03i16 | 312 312 | 352 362 | 256 259 | 159 161 | 287 293 |
| SChC03i18 | 311 312 | 344 352 | 259 286 | 164 173 | 287 293 |
| SChC03i19 | 312 312 | 352 362 | 256 259 | 159 161 | 287 293 |
| SChC03i20 | 311 312 | 344 352 | 259 286 | 164 173 | 287 293 |
| SChC03iH  | 312 312 | 362 362 | 256 259 | 161 161 | 293 293 |
| SChC04i01 | 315 318 | 344 355 | 256 256 | 164 164 | 287 289 |
| SChC04i02 | 311 318 | 348 355 | 256 271 | 161 196 | 287 287 |
| SChC04i03 | 312 364 | 344 348 | 268 280 | 164 196 | 287 293 |
| SChC04i04 | 315 315 | 344 352 | 280 280 | 153 153 | 287 287 |
| SChC04i05 | 311 318 | 348 355 | 256 271 | 161 196 | 287 287 |
| SChC04i06 | 315 318 | 344 355 | 256 256 | 164 164 | 287 289 |
| SChC04i07 | 315 315 | 347 348 | 256 259 | 161 196 | 287 287 |
| SChC04i08 | 311 318 | 348 355 | 256 271 | 161 196 | 287 287 |
| SChC04i09 | 315 318 | 344 355 | 256 256 | 164 164 | 287 289 |
| SChC04i10 | 315 315 | 347 348 | 256 259 | 161 196 | 287 287 |
| SChC04i11 | 311 315 | 348 348 | 256 268 | 164 164 | 287 299 |
| SChC04i12 | 311 318 | 348 355 | 256 271 | 161 196 | 287 287 |
| SChC04i13 | 312 364 | 344 348 | 268 280 | 164 196 | 287 293 |
| SChC04i14 | 311 318 | 348 355 | 256 271 | 161 196 | 287 287 |
| SChC04i15 | 311 315 | 344 352 | 256 282 | 154 165 | 287 301 |
| SChC04i16 | 315 315 | 347 348 | 256 259 | 161 196 | 287 287 |
| SChC04i17 | 311 318 | 348 355 | 256 271 | 161 196 | 287 287 |
| SChC04i18 | 315 318 | 344 355 | 256 256 | 164 164 | 287 289 |
| SChC04i19 | 315 318 | 344 355 | 256 256 | 164 164 | 287 289 |
| SChC04i20 | 315 318 | 344 355 | 256 256 | 164 164 | 287 289 |
| SChC04i21 | 315 318 | 344 355 | 256 256 | 164 164 | 287 289 |
| SChC04iH  | 312 364 | 344 348 | 268 280 | 164 196 | 287 293 |
| SChC05i01 | 315 315 | 348 360 | 262 262 | 164 196 | 287 291 |
| SChC05i02 | 315 315 | 348 360 | 262 262 | 164 196 | 287 291 |
| SChC05i03 | 315 315 | 348 360 | 262 262 | 164 196 | 287 291 |
| SChC05i04 | 311 344 | 348 355 | 256 259 | 164 165 | 287 289 |
| SChC05i05 | 318 318 | 352 352 | 256 262 | 161 165 | 287 287 |
| SChC05i06 | 318 318 | 352 352 | 256 262 | 161 165 | 287 287 |
| SChC05i07 | 311 344 | 348 355 | 256 259 | 164 165 | 287 289 |
| SChC05i09 | 311 344 | 348 355 | 256 259 | 164 165 | 287 289 |
| SChC05i11 | 311 344 | 348 355 | 256 259 | 164 165 | 287 289 |
| SChC05i12 | 311 344 | 348 355 | 256 259 | 164 165 | 287 289 |
| SChC05i14 | 311 344 | 348 355 | 256 259 | 164 165 | 287 289 |
| SChC05i15 | 311 318 | 344 352 | 259 259 | 164 165 | 287 287 |
| SChC05i16 | 311 344 | 348 355 | 256 259 | 164 165 | 287 289 |
| SChC05i17 | 315 315 | 348 360 | 262 262 | 164 196 | 287 291 |
| SChC05i18 | 311 344 | 348 355 | 256 259 | 164 165 | 287 289 |
| SChC05i20 | 318 318 | 352 352 | 256 262 | 161 165 | 287 287 |
| SChC06i02 | 312 318 | 352 352 | 256 259 | 173 183 | 287 291 |

|           |         |         |         |         |         |
|-----------|---------|---------|---------|---------|---------|
| SChC06i03 | 312 312 | 348 348 | 259 259 | 183 196 | 287 287 |
| SChC06i05 | 312 318 | 352 352 | 256 259 | 173 183 | 287 291 |
| SChC06i06 | 312 318 | 352 352 | 256 259 | 173 183 | 287 291 |
| SChC06i07 | 312 318 | 352 352 | 256 259 | 173 183 | 287 291 |
| SChC06i08 | 315 315 | 348 352 | 256 259 | 164 164 | 287 289 |
| SChC06i09 | 312 312 | 348 348 | 259 259 | 183 196 | 287 287 |
| SChC06i11 | 312 318 | 352 352 | 256 259 | 173 183 | 287 291 |
| SChC06i12 | 318 318 | 347 352 | 271 282 | 153 159 | 287 301 |
| SChC06i14 | 315 315 | 348 352 | 256 259 | 164 164 | 287 289 |
| SChC06i15 | 315 315 | 348 352 | 256 259 | 164 164 | 287 289 |
| SChC06i16 | 318 318 | 347 352 | 271 282 | 153 159 | 287 301 |
| SChC06i17 | 318 318 | 347 352 | 271 282 | 153 159 | 287 301 |
| SChC06i18 | 318 318 | 348 355 | 256 262 | 161 184 | 287 287 |
| SChC06i19 | 312 318 | 352 352 | 256 259 | 173 183 | 287 291 |
| SChC06i20 | 312 312 | 348 348 | 259 259 | 183 196 | 287 287 |
| SChC06i21 | 312 312 | 348 348 | 259 259 | 183 196 | 287 287 |
| SChC06iH  | 312 318 | 347 352 | 271 282 | 153 173 | 287 291 |
| SChC08i01 | 312 312 | 352 362 | 256 259 | 159 161 | 287 293 |
| SChC08i03 | 311 312 | 344 352 | 259 286 | 164 173 | 287 293 |
| SChC08i04 | 311 312 | 344 352 | 259 286 | 164 173 | 287 293 |
| SChC08i05 | 312 312 | 352 362 | 256 259 | 159 161 | 287 293 |
| SChC08i06 | 312 312 | 352 362 | 256 259 | 159 161 | 287 293 |
| SChC08i07 | 312 312 | 352 362 | 256 259 | 159 161 | 287 293 |
| SChC08i08 | 311 312 | 344 352 | 259 286 | 164 173 | 287 293 |
| SChC08i09 | 312 312 | 352 362 | 256 259 | 159 161 | 287 293 |
| SChC08i10 | 312 312 | 352 362 | 256 259 | 159 161 | 287 293 |
| SChC08i12 | 312 312 | 352 362 | 256 259 | 159 161 | 287 293 |
| SChC08i13 | 311 312 | 344 352 | 259 286 | 164 173 | 287 293 |
| SChC08i14 | 311 312 | 344 352 | 259 286 | 164 173 | 287 293 |
| SChC08i15 | 312 312 | 352 362 | 256 259 | 159 161 | 287 293 |
| SChC08i16 | 312 312 | 352 362 | 256 259 | 159 161 | 287 293 |
| SChC08i17 | 311 312 | 344 352 | 259 286 | 164 173 | 287 293 |
| SChC08i18 | 311 312 | 344 352 | 259 286 | 164 173 | 287 293 |
| SChC08i19 | 312 312 | 352 362 | 256 259 | 159 161 | 287 293 |
| SChC08i20 | 312 312 | 352 362 | 256 259 | 159 161 | 287 293 |
| SChC08i21 | 312 312 | 352 362 | 256 259 | 159 161 | 287 293 |
| SChC08iH  | 311 312 | 344 352 | 259 286 | 164 173 | 287 293 |
| SChC09i10 | 312 326 | 344 352 | 256 259 | 177 183 | 287 293 |
| SChC09i18 | 311 311 | 344 352 | 259 271 | 161 196 | 287 287 |
| SChC09iH  | 312 315 | 348 362 | 256 256 | 161 165 | 287 287 |
| SChC10i01 | 311 318 | 344 352 | 259 259 | 164 165 | 287 287 |
| SChC10i02 | 311 318 | 344 352 | 259 259 | 164 165 | 287 287 |
| SChC10i03 | 311 318 | 344 352 | 259 259 | 164 165 | 287 287 |
| SChC10i05 | 311 344 | 348 355 | 256 259 | 164 165 | 287 289 |
| SChC10i07 | 311 344 | 348 355 | 256 259 | 164 165 | 287 289 |
| SChC10i11 | 311 318 | 344 352 | 259 259 | 164 165 | 287 287 |
| SChC10i15 | 311 344 | 348 355 | 256 259 | 164 165 | 287 289 |

|           |         |         |         |         |         |
|-----------|---------|---------|---------|---------|---------|
| SChC10iH  | 318 318 | 352 352 | 256 262 | 161 165 | 287 287 |
| pop = TC  |         |         |         |         |         |
| TChB01i05 | 312 315 | 344 348 | 256 256 | 164 173 | 287 301 |
| TChB01i06 | 312 315 | 344 348 | 256 256 | 164 173 | 287 301 |
| TChB01i07 | 312 315 | 344 348 | 256 256 | 164 173 | 287 301 |
| TChB01i08 | 312 315 | 344 348 | 256 256 | 164 173 | 287 301 |
| TChB01i09 | 312 315 | 344 348 | 256 256 | 164 173 | 287 301 |
| TChB01i10 | 312 315 | 344 348 | 256 256 | 164 173 | 287 301 |
| TChB01i11 | 312 315 | 344 348 | 256 256 | 164 173 | 287 301 |
| TChB01i12 | 312 315 | 344 348 | 256 256 | 164 173 | 287 301 |
| TChB01i13 | 312 315 | 344 348 | 256 256 | 164 173 | 287 301 |
| TChB01i14 | 312 315 | 344 348 | 256 256 | 164 173 | 287 301 |
| TChB01i15 | 312 315 | 344 348 | 256 256 | 164 173 | 287 301 |
| TChB01i16 | 312 315 | 344 348 | 256 256 | 164 173 | 287 301 |
| TChB02i22 | 312 315 | 348 355 | 259 271 | 164 165 | 287 289 |
| TChB02i23 | 312 315 | 343 355 | 256 256 | 161 164 | 287 293 |
| TChB02i24 | 312 315 | 348 355 | 259 271 | 164 165 | 287 289 |
| TChB02i26 | 312 315 | 348 355 | 259 271 | 164 165 | 287 289 |
| TChB02i27 | 312 315 | 348 355 | 259 271 | 164 165 | 287 289 |
| TChB02i28 | 312 315 | 348 355 | 259 271 | 164 165 | 287 289 |
| TChB02i29 | 312 315 | 348 355 | 259 271 | 164 165 | 287 289 |
| TChB02i30 | 312 315 | 348 355 | 259 271 | 164 165 | 287 289 |
| TChB02i31 | 312 315 | 348 355 | 259 271 | 164 165 | 287 289 |
| TChB02i32 | 312 315 | 343 355 | 256 256 | 161 164 | 287 293 |
| TChB02i33 | 312 315 | 348 355 | 259 271 | 164 165 | 287 289 |
| TChB02i34 | 312 315 | 348 355 | 259 271 | 164 165 | 287 289 |
| TChB02i35 | 312 315 | 348 355 | 259 271 | 164 165 | 287 289 |
| TChB02i36 | 312 315 | 343 355 | 256 256 | 161 164 | 287 293 |
| TChB02i37 | 312 315 | 348 355 | 259 271 | 164 165 | 287 289 |
| TChB02i38 | 312 315 | 348 355 | 259 271 | 164 165 | 287 289 |
| TChB02i39 | 312 315 | 348 355 | 259 271 | 164 165 | 287 289 |
| TChB02i40 | 312 315 | 343 355 | 256 256 | 161 164 | 287 293 |
| TChB02i41 | 312 315 | 343 355 | 256 256 | 161 164 | 287 293 |
| TChB02i42 | 312 315 | 348 355 | 259 271 | 164 165 | 287 289 |
| TChB02i43 | 312 315 | 348 355 | 259 271 | 164 165 | 287 289 |
| TChB02i45 | 312 315 | 348 355 | 259 271 | 164 165 | 287 289 |
| TChB02i46 | 312 315 | 348 355 | 259 271 | 164 165 | 287 289 |
| TChB02i47 | 312 315 | 348 355 | 259 271 | 164 165 | 287 289 |
| TChB02i48 | 312 315 | 343 355 | 256 256 | 161 164 | 287 293 |
| TChB02i49 | 312 315 | 348 355 | 259 271 | 164 165 | 287 289 |
| TChB02i50 | 312 315 | 348 355 | 259 271 | 164 165 | 287 289 |
| TChB02i51 | 312 315 | 348 355 | 259 271 | 164 165 | 287 289 |
| TChB03i01 | 332 332 | 348 355 | 259 259 | 161 171 | 287 289 |
| TChB03i02 | 332 332 | 348 355 | 259 259 | 161 171 | 287 289 |
| TChB03i04 | 332 332 | 348 355 | 259 259 | 161 171 | 287 289 |
| TChB03i05 | 332 332 | 348 355 | 259 259 | 161 171 | 287 289 |
| TChB03i06 | 332 332 | 348 355 | 259 259 | 161 171 | 287 289 |

|           |         |         |         |         |         |
|-----------|---------|---------|---------|---------|---------|
| TChB03i07 | 332 332 | 348 355 | 259 259 | 161 171 | 287 289 |
| TChB03i08 | 332 332 | 348 355 | 259 259 | 161 171 | 287 289 |
| TChB03i09 | 332 332 | 348 355 | 259 259 | 161 171 | 287 289 |
| TChB03i10 | 332 332 | 348 355 | 259 259 | 161 171 | 287 289 |
| TChB03i11 | 332 332 | 348 355 | 259 259 | 161 171 | 287 289 |
| TChB03i13 | 332 332 | 348 355 | 259 259 | 161 171 | 287 289 |
| TChB03i14 | 332 332 | 348 355 | 259 259 | 161 171 | 287 289 |
| TChB03i15 | 332 332 | 348 355 | 259 259 | 161 171 | 287 289 |
| TChB03i16 | 332 332 | 348 355 | 259 259 | 161 171 | 287 289 |
| TChB03i17 | 332 332 | 348 355 | 259 259 | 161 171 | 287 289 |
| TChB03i18 | 332 332 | 348 355 | 259 259 | 161 171 | 287 289 |
| TChB03i19 | 332 332 | 348 355 | 259 259 | 161 171 | 287 289 |
| TChB03i20 | 332 332 | 348 355 | 259 259 | 161 171 | 287 289 |
| TChB03i21 | 332 332 | 348 355 | 259 259 | 161 171 | 287 289 |
| TChB03iH  | 332 332 | 348 355 | 259 259 | 161 171 | 287 289 |
| TChB04i02 | 312 315 | 344 344 | 256 280 | 153 173 | 291 301 |
| TChB04i03 | 312 315 | 344 344 | 256 280 | 153 173 | 291 301 |
| TChB04i10 | 311 318 | 348 355 | 256 259 | 164 173 | 287 287 |
| TChB04i17 | 312 315 | 344 344 | 256 280 | 153 173 | 291 301 |
| TChB05i01 | 311 332 | 344 348 | 262 282 | 159 161 | 287 287 |
| TChB05i03 | 311 332 | 344 348 | 262 282 | 159 161 | 287 287 |
| TChB05i04 | 311 332 | 344 348 | 262 282 | 159 161 | 287 287 |
| TChB05i05 | 311 332 | 344 348 | 262 282 | 159 161 | 287 287 |
| TChB05i06 | 311 332 | 344 348 | 262 282 | 159 161 | 287 287 |
| TChB05i07 | 311 332 | 344 348 | 262 282 | 159 161 | 287 287 |
| TChB05i08 | 311 332 | 344 348 | 262 282 | 159 161 | 287 287 |
| TChB05i09 | 311 332 | 344 348 | 262 282 | 159 161 | 287 287 |
| TChB05i10 | 311 332 | 344 348 | 262 282 | 159 161 | 287 287 |
| TChB05i11 | 311 332 | 344 348 | 262 282 | 159 161 | 287 287 |
| TChB05i12 | 311 332 | 344 348 | 262 282 | 159 161 | 287 287 |
| TChB05i13 | 311 332 | 344 348 | 262 282 | 159 161 | 287 287 |
| TChB05i14 | 311 332 | 344 348 | 262 282 | 159 161 | 287 287 |
| TChB05i15 | 311 332 | 344 348 | 262 282 | 159 161 | 287 287 |
| TChB05i16 | 311 332 | 344 348 | 262 282 | 159 161 | 287 287 |
| TChB05i17 | 311 332 | 344 348 | 262 282 | 159 161 | 287 287 |
| TChB05i18 | 311 332 | 344 348 | 262 282 | 159 161 | 287 287 |
| TChB05i20 | 311 332 | 344 348 | 262 282 | 159 161 | 287 287 |
| TChB05i21 | 311 332 | 344 348 | 262 282 | 159 161 | 287 287 |
| TChB06i05 | 312 312 | 344 356 | 251 256 | 164 171 | 287 287 |
| TChB06i07 | 312 318 | 344 355 | 256 256 | 196 196 | 297 301 |
| TChB06i08 | 312 312 | 344 356 | 251 256 | 164 171 | 287 287 |
| TChB06i12 | 312 312 | 344 356 | 251 256 | 164 171 | 287 287 |
| TChB06i15 | 312 312 | 344 356 | 251 256 | 164 171 | 287 287 |
| TChB06i16 | 312 312 | 344 356 | 251 256 | 164 171 | 287 287 |
| TChB06i19 | 312 315 | 352 352 | 256 271 | 177 183 | 285 289 |
| TChB06i20 | 312 312 | 344 356 | 251 256 | 164 171 | 287 287 |
| TChB06iH  | 311 315 | 352 355 | 256 259 | 196 196 | 287 287 |

|           |         |         |         |         |         |
|-----------|---------|---------|---------|---------|---------|
| TChB07i02 | 312 315 | 348 356 | 256 280 | 164 171 | 287 287 |
| TChB07i03 | 315 315 | 344 347 | 259 262 | 164 184 | 287 293 |
| TChB07i04 | 315 366 | 352 355 | 256 256 | 164 164 | 287 287 |
| TChB07i05 | 315 315 | 344 347 | 259 262 | 164 184 | 287 293 |
| TChB07i07 | 315 315 | 344 347 | 259 262 | 164 184 | 287 293 |
| TChB07i08 | 315 315 | 344 347 | 259 262 | 164 184 | 287 293 |
| TChB07i09 | 318 321 | 348 348 | 256 271 | 153 153 | 287 297 |
| TChB07i10 | 311 315 | 348 362 | 256 256 | 164 164 | 287 301 |
| TChB07i11 | 315 366 | 352 355 | 256 256 | 164 164 | 287 287 |
| TChB07i12 | 312 332 | 344 352 | 259 271 | 177 183 | 287 289 |
| TChB07i13 | 315 366 | 352 355 | 256 256 | 164 164 | 287 287 |
| TChB07i14 | 311 315 | 348 362 | 256 256 | 164 164 | 287 301 |
| TChB07i15 | 315 315 | 344 347 | 259 262 | 164 184 | 287 293 |
| TChB07i16 | 315 366 | 352 355 | 256 256 | 164 164 | 287 287 |
| TChB07i17 | 315 366 | 352 355 | 256 256 | 164 164 | 287 287 |
| TChB07i18 | 311 312 | 344 352 | 259 265 | 164 164 | 289 291 |
| TChB07i19 | 315 315 | 344 347 | 259 262 | 164 184 | 287 293 |
| TChB07i20 | 311 312 | 344 352 | 259 265 | 164 164 | 289 291 |
| TChB07i21 | 311 315 | 348 362 | 256 256 | 164 164 | 287 301 |
| TChB07iH  | 315 315 | 344 347 | 259 262 | 164 184 | 287 293 |
| TChB08i01 | 312 315 | 348 366 | 256 259 | 164 171 | 285 301 |
| TChB08i10 | 312 315 | 348 366 | 256 259 | 164 171 | 285 301 |
| TChB08i12 | 312 312 | 348 366 | 256 271 | 161 165 | 287 289 |
| TChB08i14 | 312 315 | 344 344 | 265 286 | 164 164 | 287 287 |
| TChB09i01 | 312 318 | 348 352 | 260 271 | 169 196 | 287 287 |
| TChB09i02 | 312 318 | 352 356 | 256 271 | 159 161 | 285 287 |
| TChB09i03 | 311 318 | 348 352 | 256 259 | 164 177 | 287 287 |
| TChB09i04 | 312 315 | 344 356 | 256 256 | 153 196 | 287 293 |
| TChB09i05 | 312 318 | 352 356 | 256 271 | 159 161 | 285 287 |
| TChB09i06 | 312 315 | 344 356 | 256 256 | 153 196 | 287 293 |
| TChB09i07 | 312 315 | 344 356 | 256 256 | 153 196 | 287 293 |
| TChB09i08 | 312 315 | 344 356 | 256 256 | 153 196 | 287 293 |
| TChB09i09 | 312 315 | 344 356 | 256 256 | 153 196 | 287 293 |
| TChB09i10 | 312 318 | 352 356 | 256 271 | 159 161 | 285 287 |
| TChB09i11 | 312 315 | 344 356 | 256 256 | 153 196 | 287 293 |
| TChB09i12 | 312 318 | 348 352 | 260 271 | 169 196 | 287 287 |
| TChB09i13 | 311 318 | 348 352 | 256 259 | 164 177 | 287 287 |
| TChB09i14 | 312 318 | 348 352 | 260 271 | 169 196 | 287 287 |
| TChB09i15 | 312 318 | 348 352 | 260 271 | 169 196 | 287 287 |
| TChB09i16 | 311 312 | 344 352 | 256 286 | 171 183 | 287 291 |
| TChB09i17 | 311 318 | 348 352 | 256 259 | 164 177 | 287 287 |
| TChB09i18 | 312 318 | 352 356 | 256 271 | 159 161 | 285 287 |
| TChB09i19 | 312 315 | 344 348 | 256 271 | 164 196 | 287 287 |
| TChB09i20 | 312 315 | 355 355 | 256 259 | 164 164 | 287 287 |
| TChB09i21 | 312 318 | 352 355 | 256 256 | 177 177 | 287 287 |
| TChB09iH  | 312 315 | 344 356 | 256 256 | 153 196 | 287 293 |

**Table S3.** Number of alleles, gene diversity, and  $F_{IS}$  values for each microsatellite locus. Summary data are based on the data of just the unique clones ( $N = 54$ ) as this would reflect the product of sexual reproduction in the parental generation of the sample. The statistical tests of  $F_{IS}$  were based on 10,000 randomizations of alleles among individuals in SPAGeDI.

| Locus      | Number of alleles | Gene diversity ( $H_s$ ) | $F_{IS}$ | 2-tailed $p$ -value |
|------------|-------------------|--------------------------|----------|---------------------|
| DdMs21     | 10                | 0.773                    | 0.066    | 0.35                |
| DdMs28     | 10                | 0.816                    | 0.001    | 0.98                |
| DdMs60     | 11                | 0.760                    | 0.026    | 0.71                |
| DdMs70     | 13                | 0.868                    | 0.168    | <b>0.002</b>        |
| DdMs95     | 8                 | 0.571                    | -0.038   | 0.65                |
| Multilocus |                   |                          | 0.052    | 0.076               |
